# Supplementary material for: Phthalocyanine-induced iron active species in metal–organic framework-derived porous carbon for efficient alkaline zinc–air batteries
Source: Royal Society of Chemistry journal article supplement (doi:10.1039/d2qi00394e), 2022-01-01
Supplement: d2qi00394e1.pdf [file d2qi00394e1.pdf]

## Supporting Information

### **Phthalocyanine-Induced Iron Active Species in Metal-Organic Framework-Derived Porous Carbon for Efficient Alkaline Zinc-Air Batteries**

Cheng Han<sup>[a]</sup>, Xiaodeng Zhang<sup>[a]</sup>, Qihong Sun<sup>[a]</sup>, Dandan Chen<sup>[a]</sup>, Tingting Miao<sup>[a]</sup>,  
Kongzhao Su<sup>[b]</sup>, Qipeng Li<sup>[b,c]</sup>, Jinjie Qian<sup>\*[a,b]</sup> and Shaoming Huang<sup>[d]</sup>

<sup>a</sup>Key Laboratory of Carbon Materials of Zhejiang Province, College of Chemistry and Materials Engineering, Wenzhou University, Wenzhou, Zhejiang, P. R. China

<sup>b</sup>State Key Laboratory of Structural Chemistry, Fujian Institute of Research on the Structure of Matter, Chinese Academy of Sciences, Fuzhou, Fujian, P. R. China

<sup>c</sup>College of Chemistry and Chemical Engineering, Zhaotong University, Zhaotong, Yunnan, P. R. China

<sup>d</sup>School of Materials and Energy, Guangzhou Key Laboratory of Low-Dimensional Materials and Energy Storage Devices, Guangdong University of Technology, Guangzhou, P. R. China

\*Corresponding author

E-mail: jinjieqian@wzu.edu.cn

# Table of Content

|                                              |         |
|----------------------------------------------|---------|
| 1. General Instruments                       | S3      |
| 2. Coordination Environment And Crystal Data | S4-S6   |
| 3. TGA Curves                                | S7      |
| 4. Additional Photographs and SEM/TEM Images | S8-S16  |
| 5. Additional XPS Data                       | S17-S20 |
| 6. Additional Electrochemical Data           | S21-S23 |
| 7. Additional Theoretical Data               | S23-    |
|                                              | S27     |
| 8. Additional Tables                         | S28-    |
|                                              | S35     |
| 9. References                                | S36     |

## **General Instruments.**

Scanning electron microscopy (SEM) data were obtained within a JSM-6700F field emission scanning electron microscope at 10 kV. High-resolution transmission electron microscope (HR-TEM) and energy dispersive spectroscopy (EDS) were collected on a JEOL JEM2100F microscope at a high voltage of 200 kV. Single gas adsorption/desorption were performed in the Accelerated Surface Area and Porosimetry System 2020 (ASAP 2020), and the N<sub>2</sub> sorption was at 77 K. The powder X-ray diffraction patterns (PXRD) were acquired with a Bruker D8 Advance using Cu K $\alpha$  radiation (0.154 nm). Raman spectra were obtained in a Renishaw instrument (in Via-Reflex) with the 532 nm wavelength. X-ray photo electron spectroscopy (XPS) characterizations were carried out on a high resolution electron energy analyzer (Gamma data-Scienta SES 2002) using monochromatic Al K $\alpha$  X-rays. The information on fraction and structure was obtained by a Rigaku Mercury CCD diffractometer applied with a graphite-monochromated Mo K $\alpha$  radiation (0.71073 Å) at 293 K.

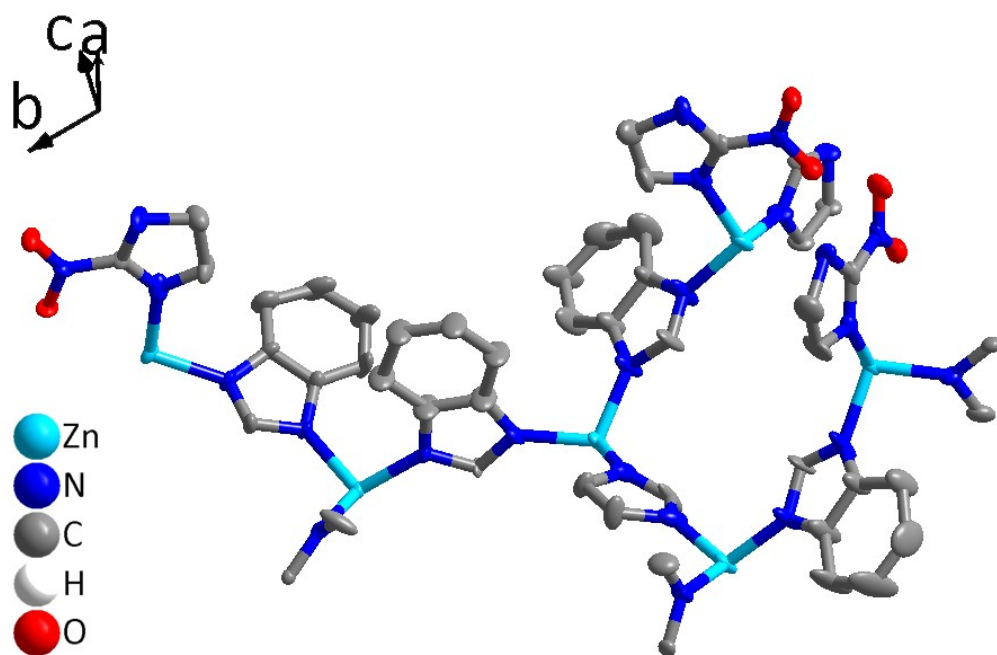

**Figure S1.** Asymmetric Unit (AU) of **BMM-14** without H atom.

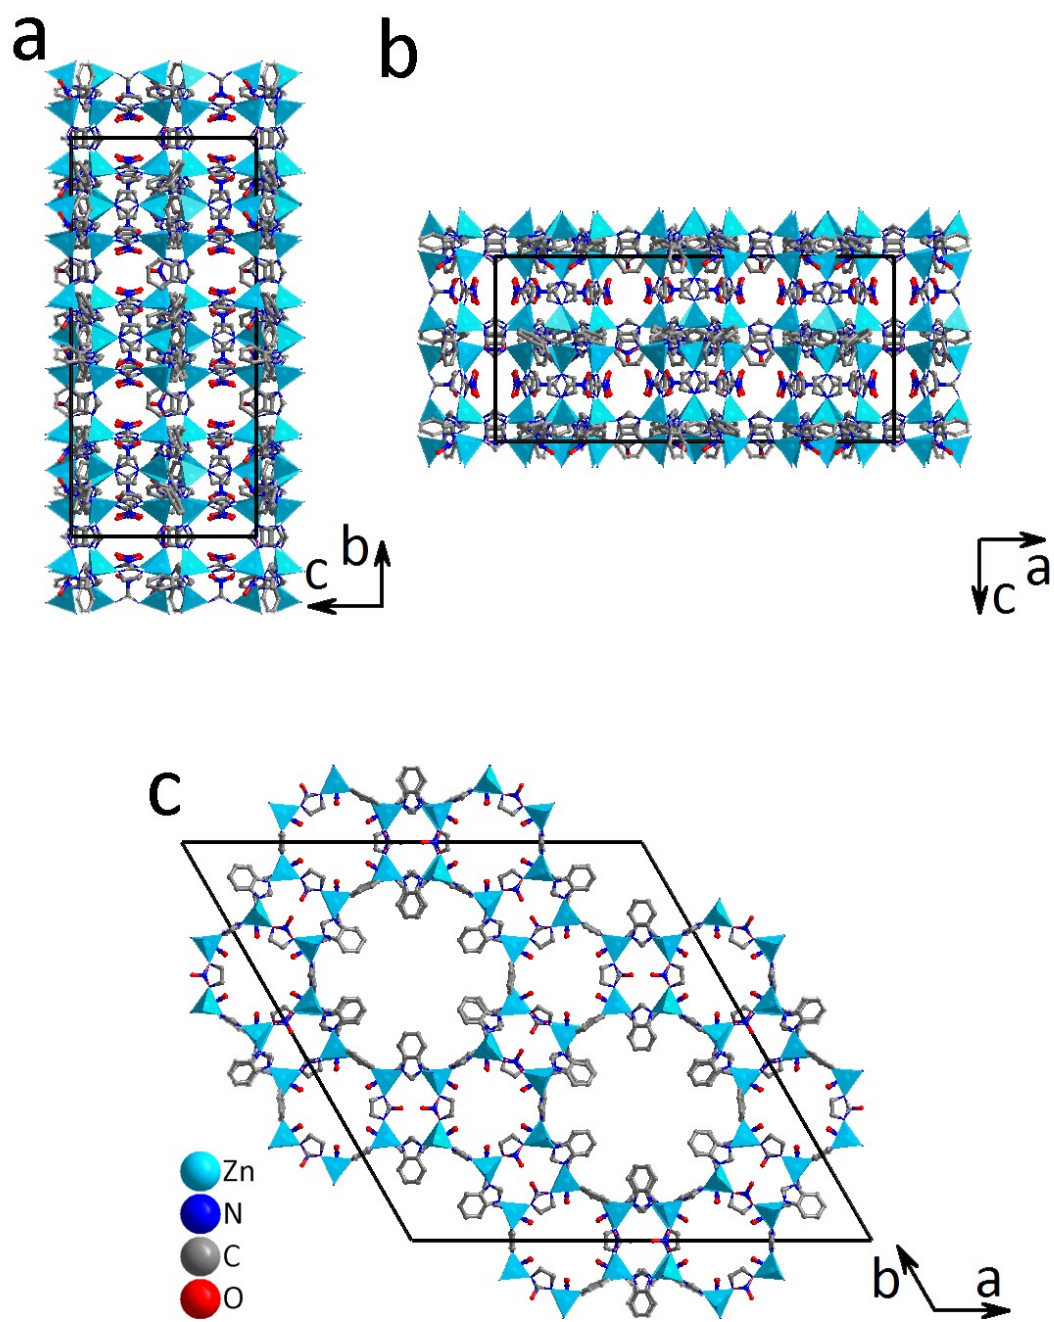

**Figure S2.** Structure of **BMM-14** along (a)  $a$  aix; (b)  $b$  aix and (c)  $c$  aix

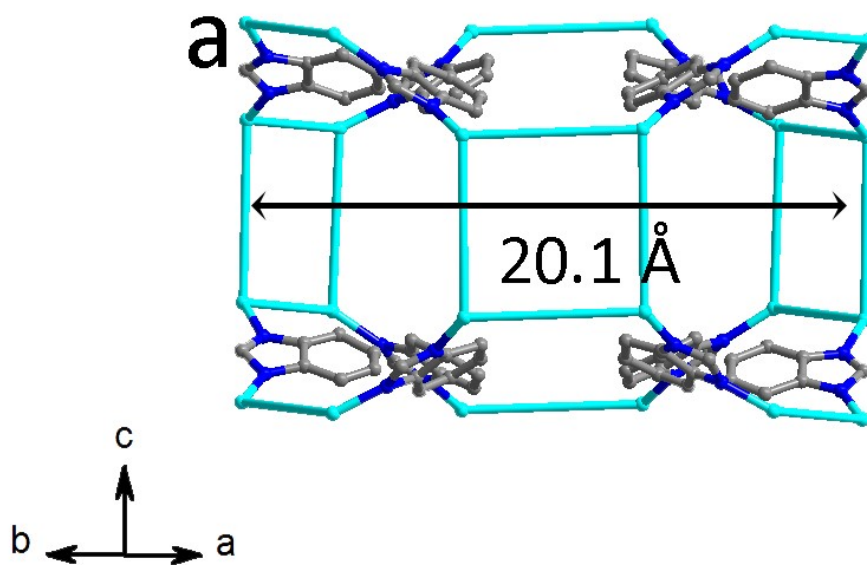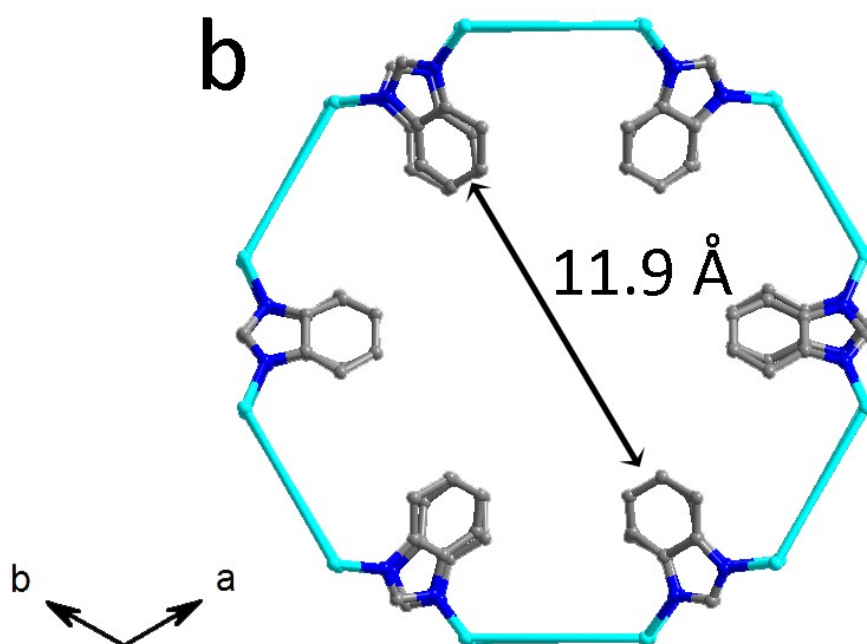

**Figure S3.** The influence of bIm on the channel width in the **BMM-14** structure, except for the bIm along the *ab* plane, the other ligands are replaced by stick models.

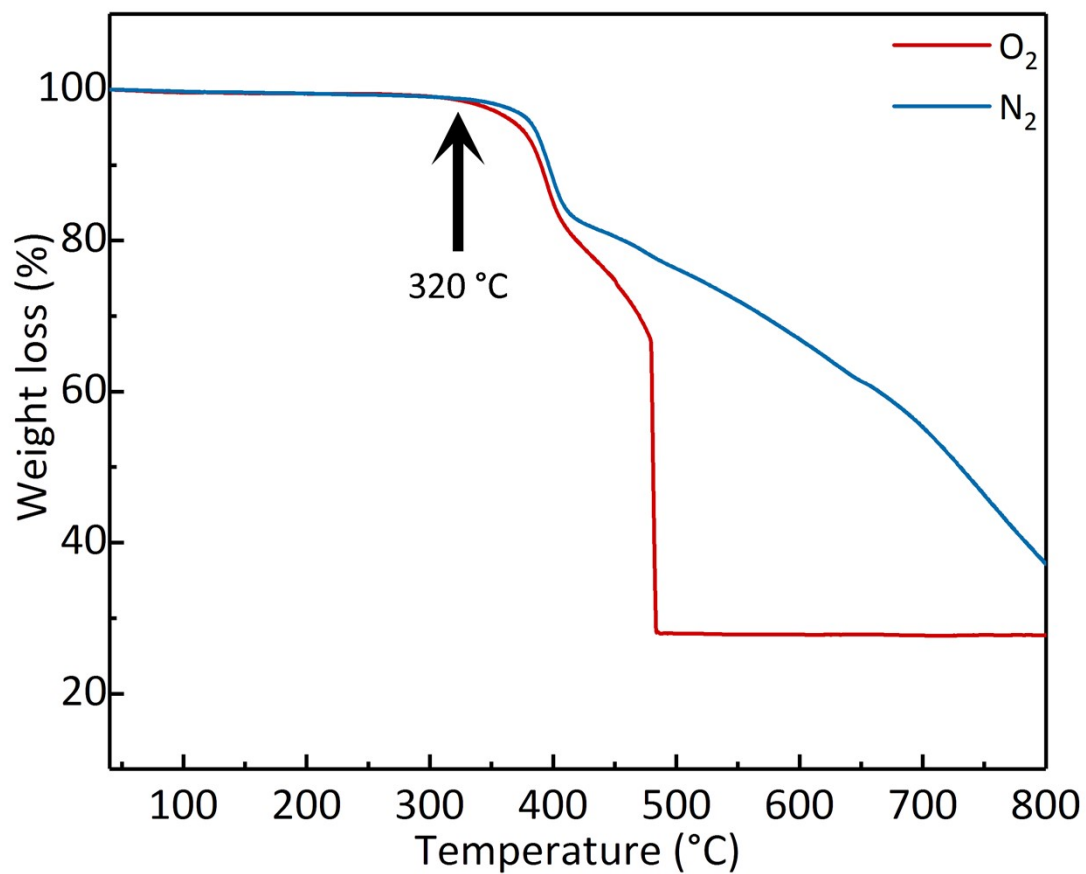

**Figure S4.** Thermogravimetric analysis (TGA) curves of **BMM-14** in N<sub>2</sub> and O<sub>2</sub> atmosphere.

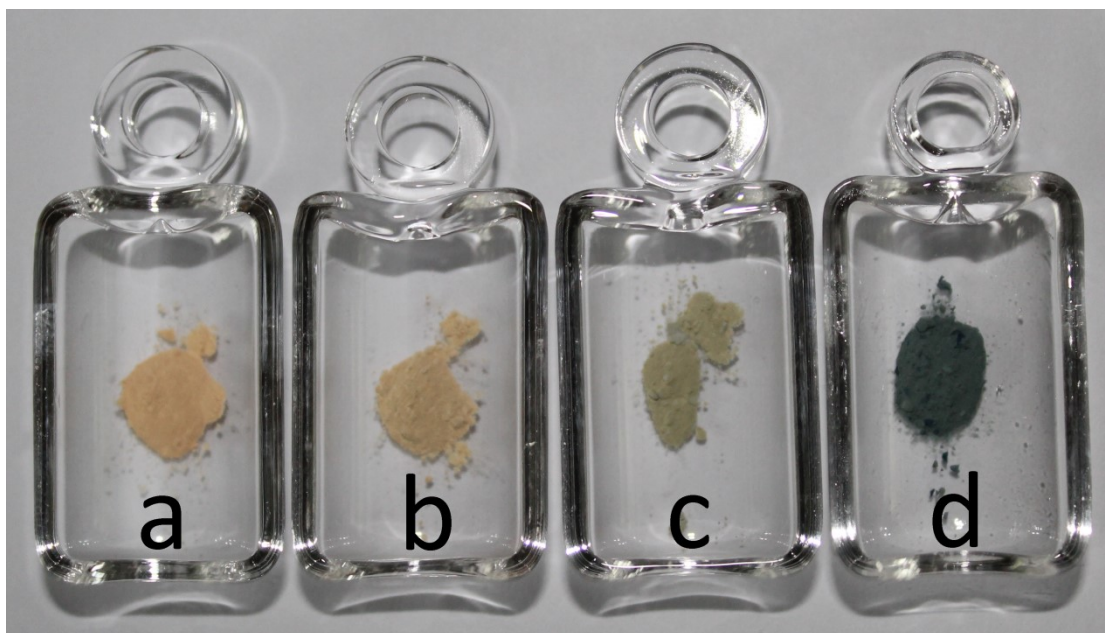

**Figure S5.** The color of (a) **FePc@BMM-14(0)**, (b) **FePc@BMM-14(0.1)**, (c) **FePc@BMM-14(1)** and (d) **FePc@BMM-14(10)** after dispersion.



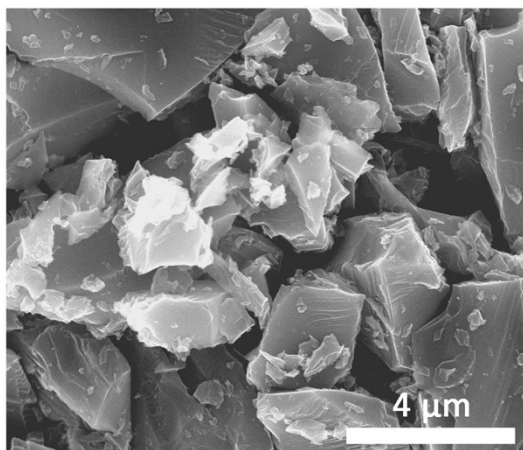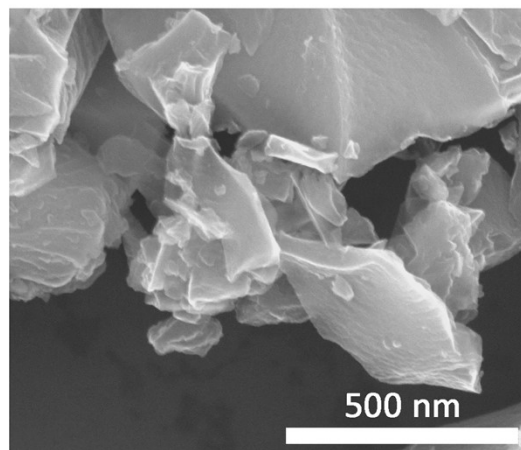

**Figure S6. SEM of FePc@BMM-1(0).**

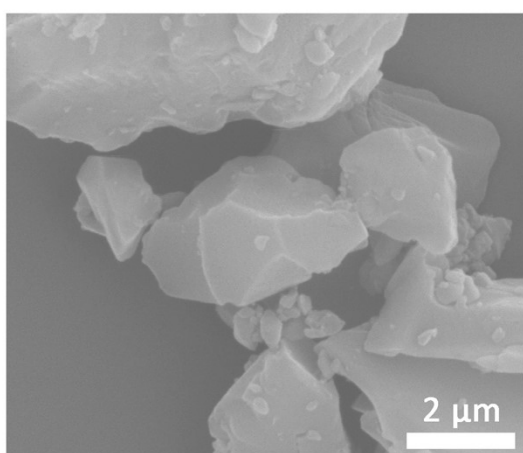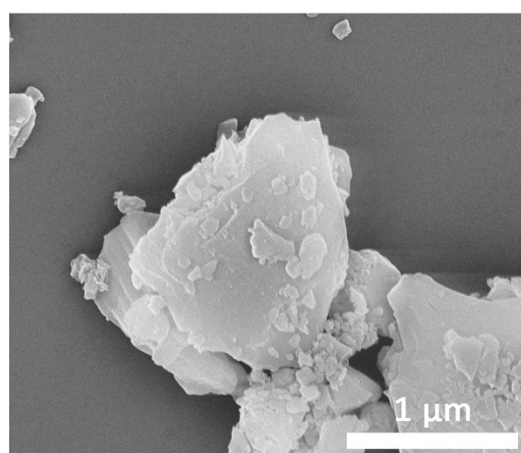

**Figure S7. SEM of FePc@BMM-1(0.1).**

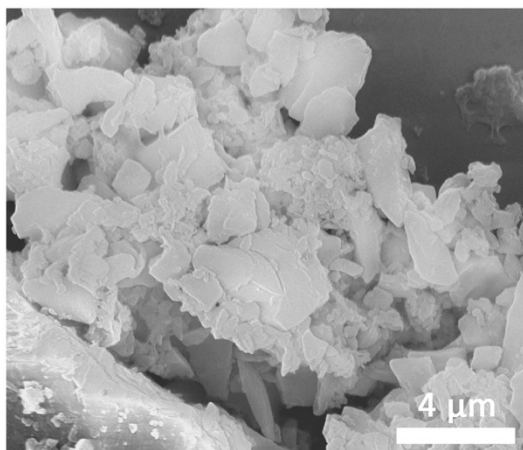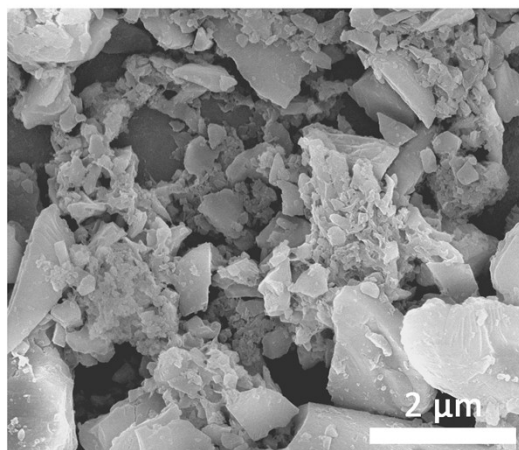

**Figure S8.** SEM of FePc@BMM-1(1).

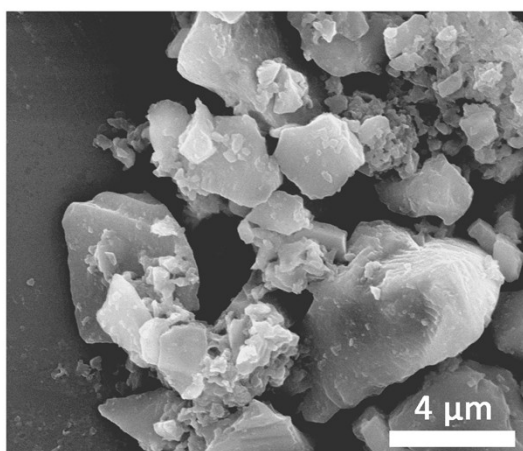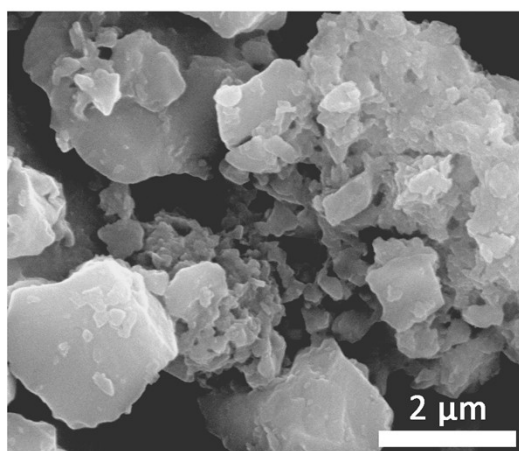

**Figure S9.** SEM of FePc@BMM-1(10).

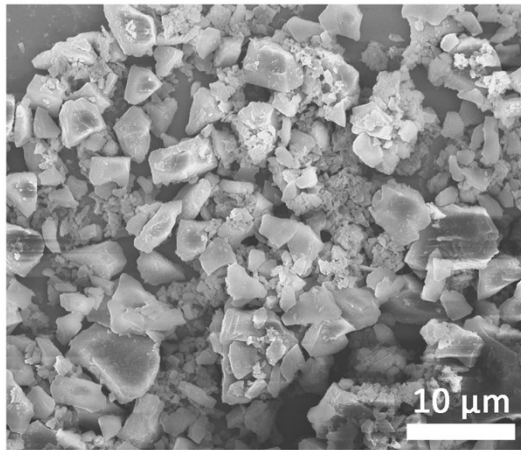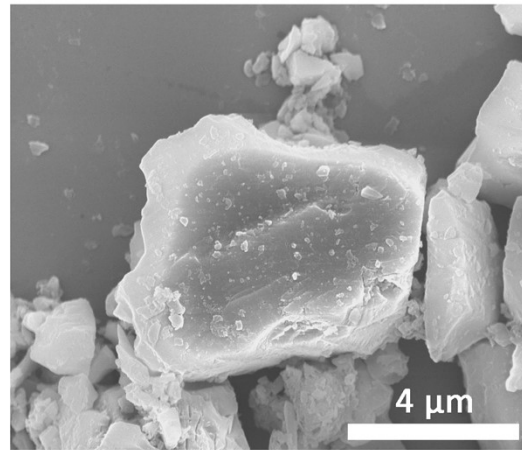

**Figure S10.** SEM of Fe@NC(0+900).

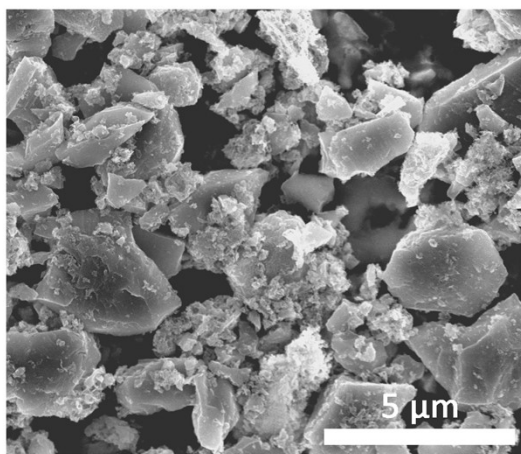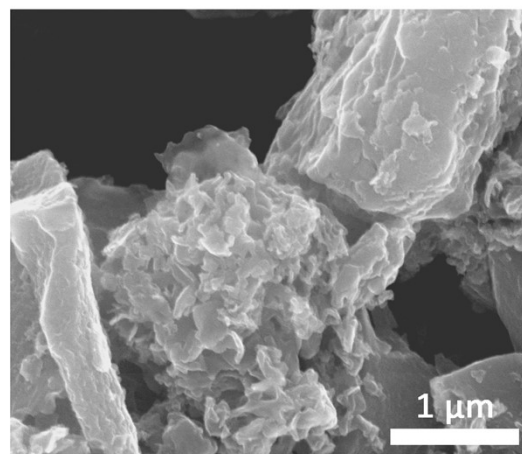

**Figure S11.** SEM of Fe@NC(10+700).

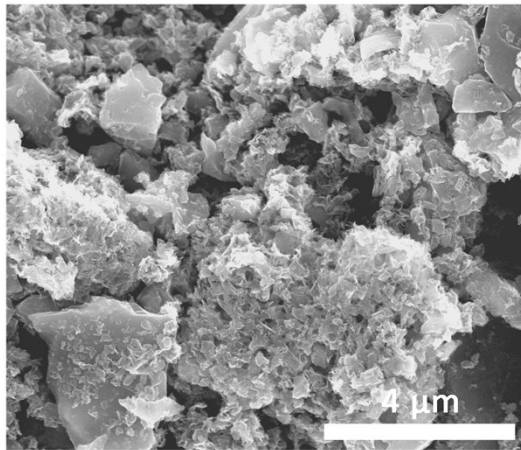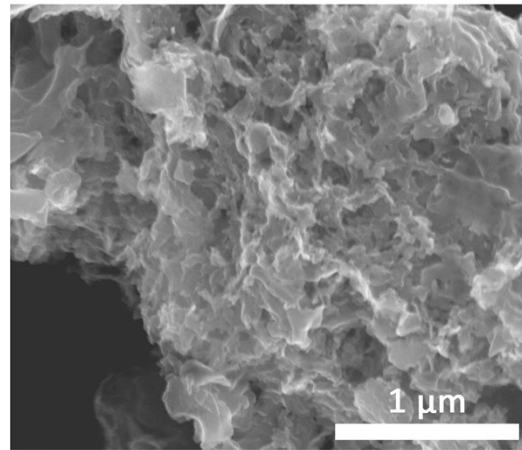

**Figure S12.** SEM of Fe@NC(10+800).

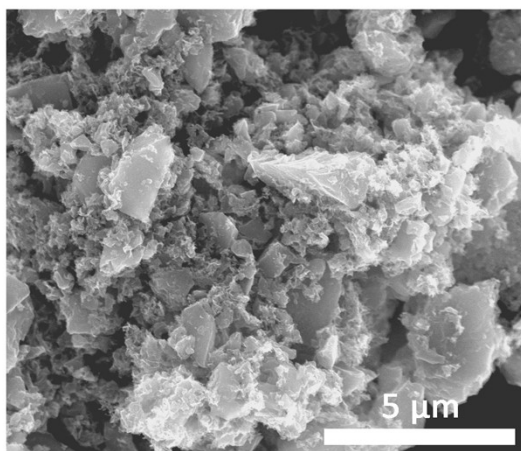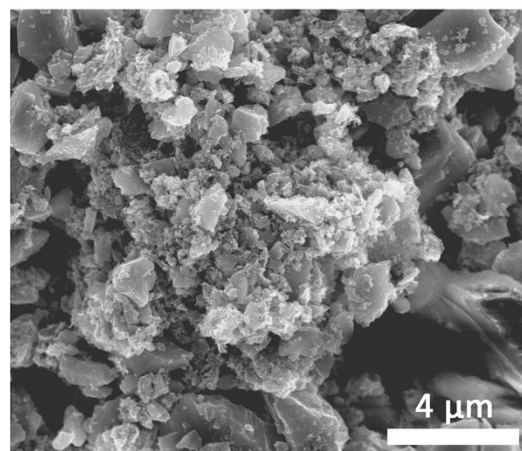

**Figure S13.** SEM of Fe@NC(10+900).

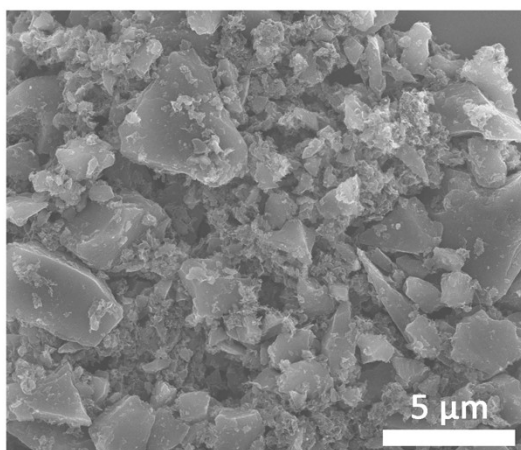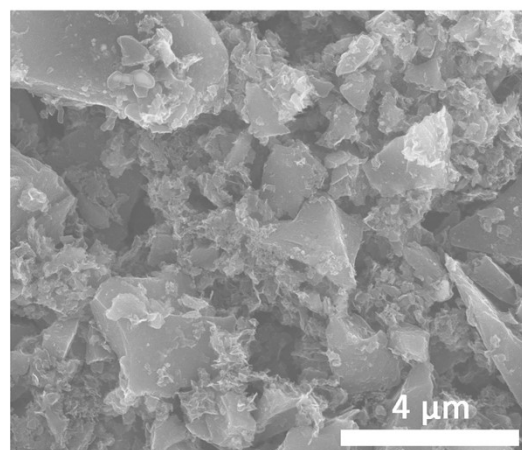

**Figure S14.** SEM of Fe@NC(10+1000).

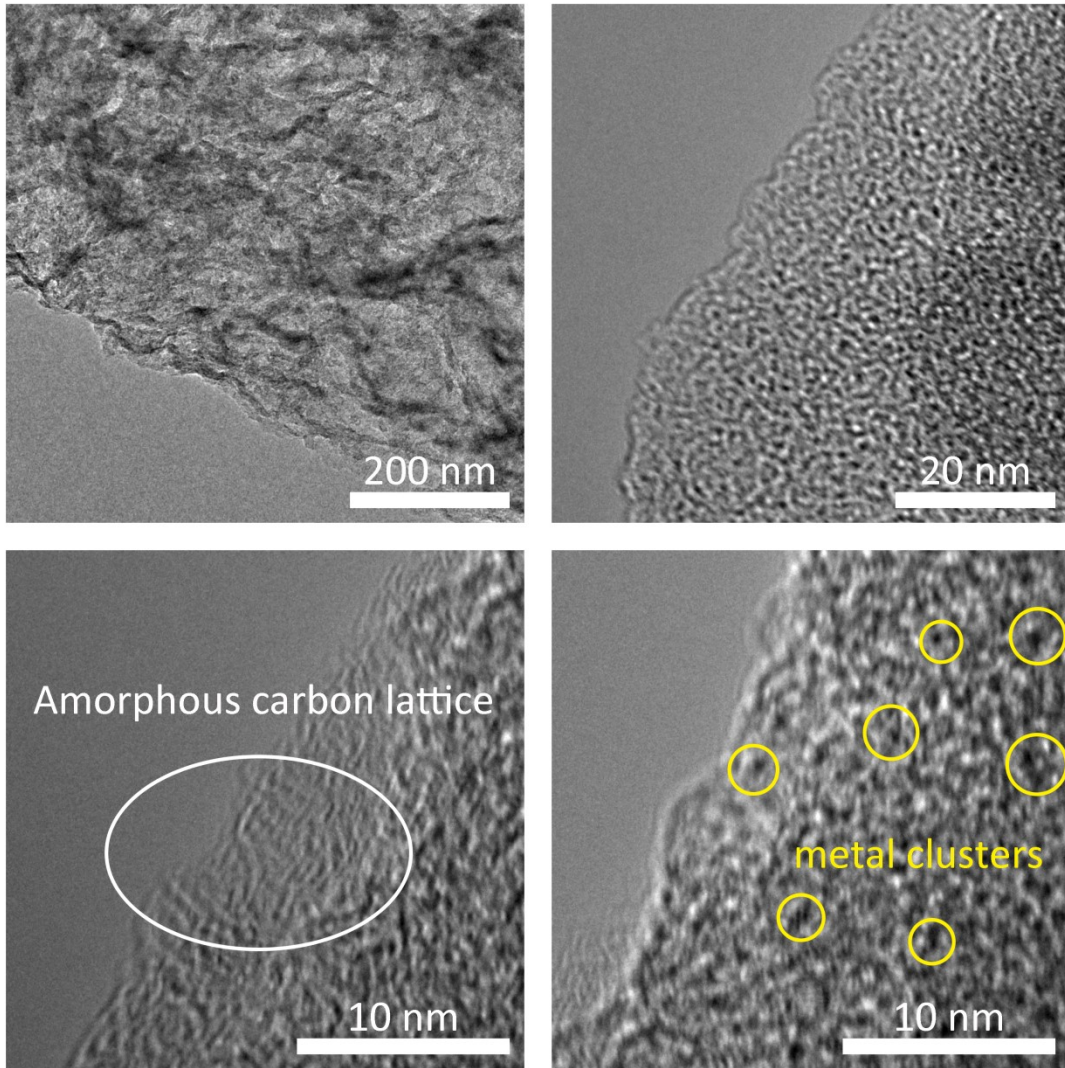

**Figure S15.** TEM images of **Fe@NC(10+700)**.



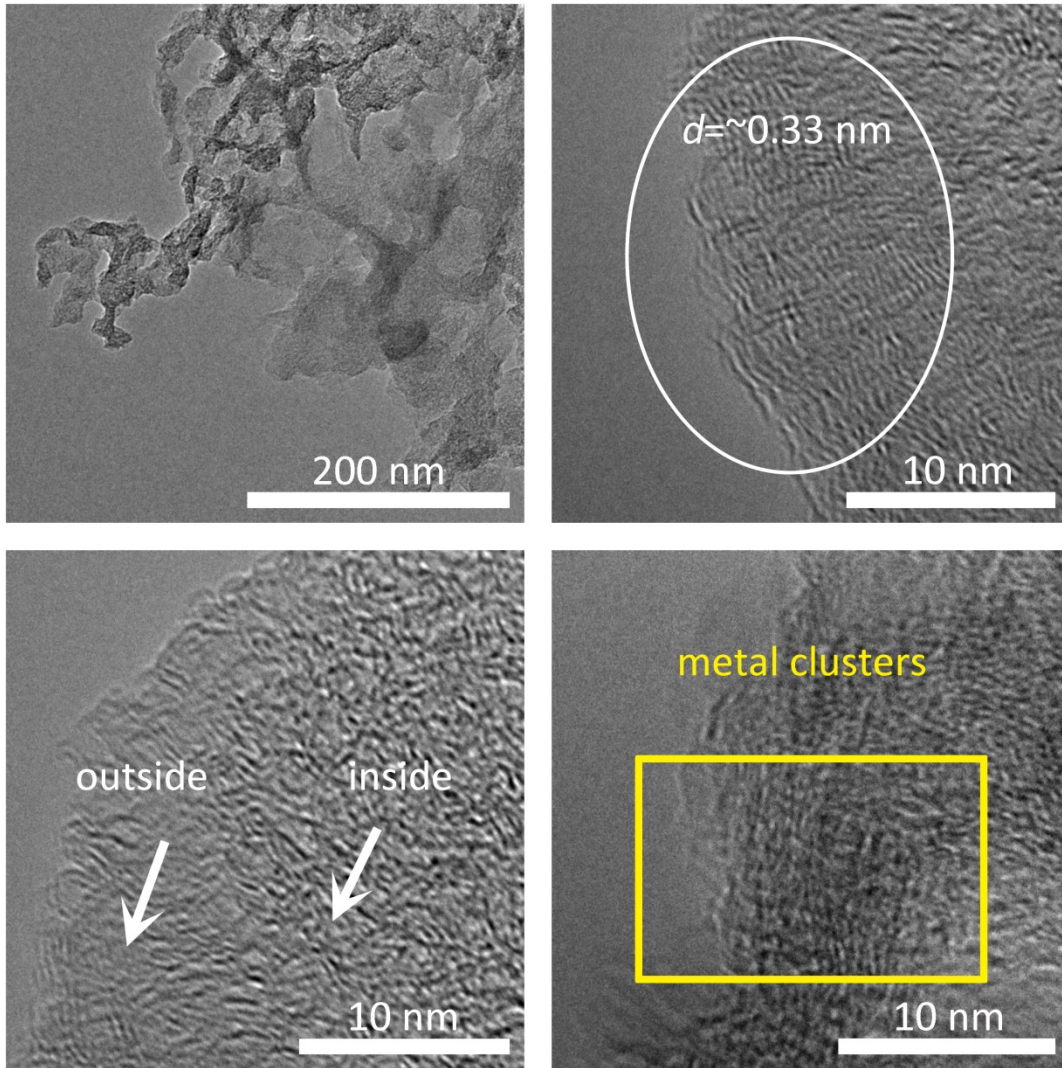

**Figure S16.** TEM images of **Fe@NC(10+800)**.

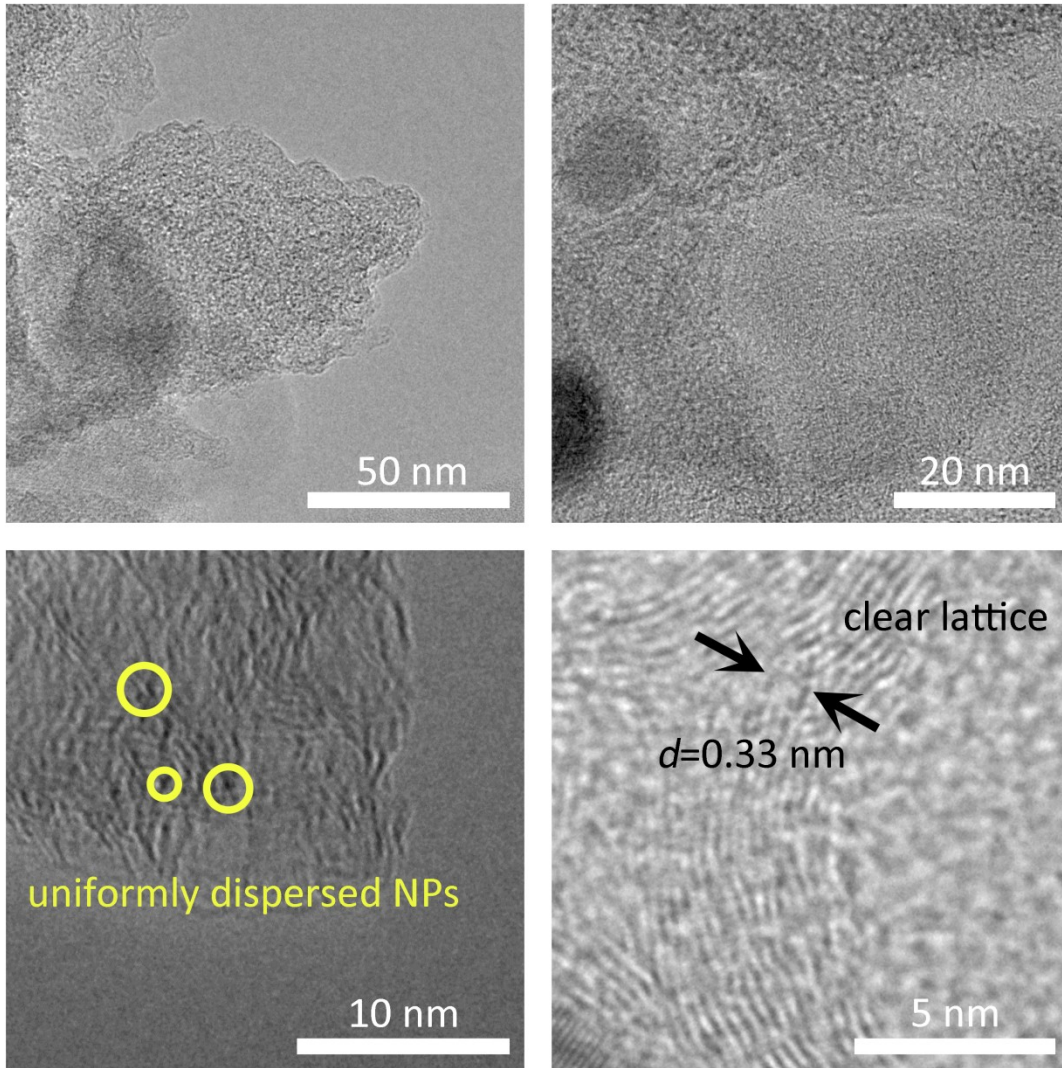

**Figure S17.** TEM images of **Fe@NC(10+900)**.

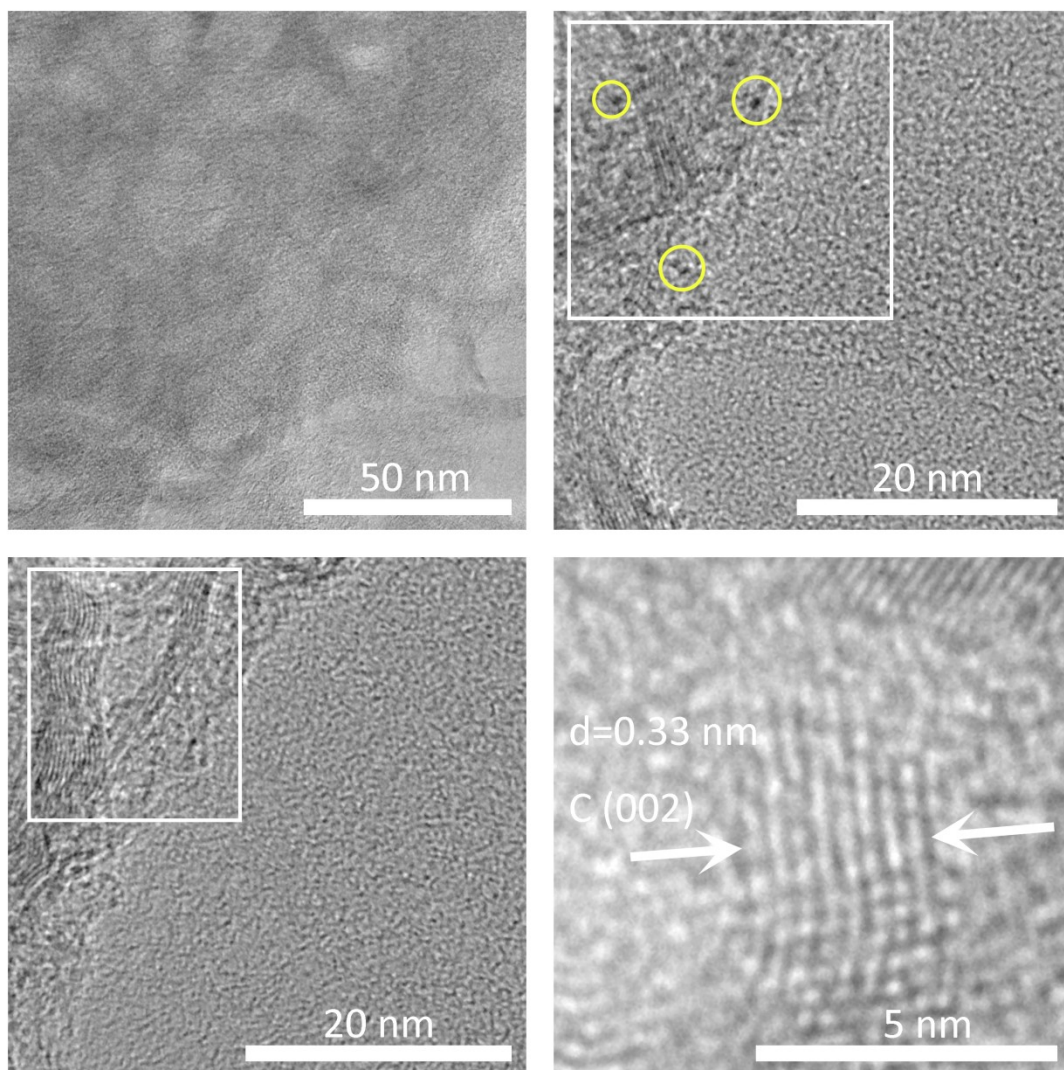

**Figure S18.** TEM images of **Fe@NC(10+1000)**.



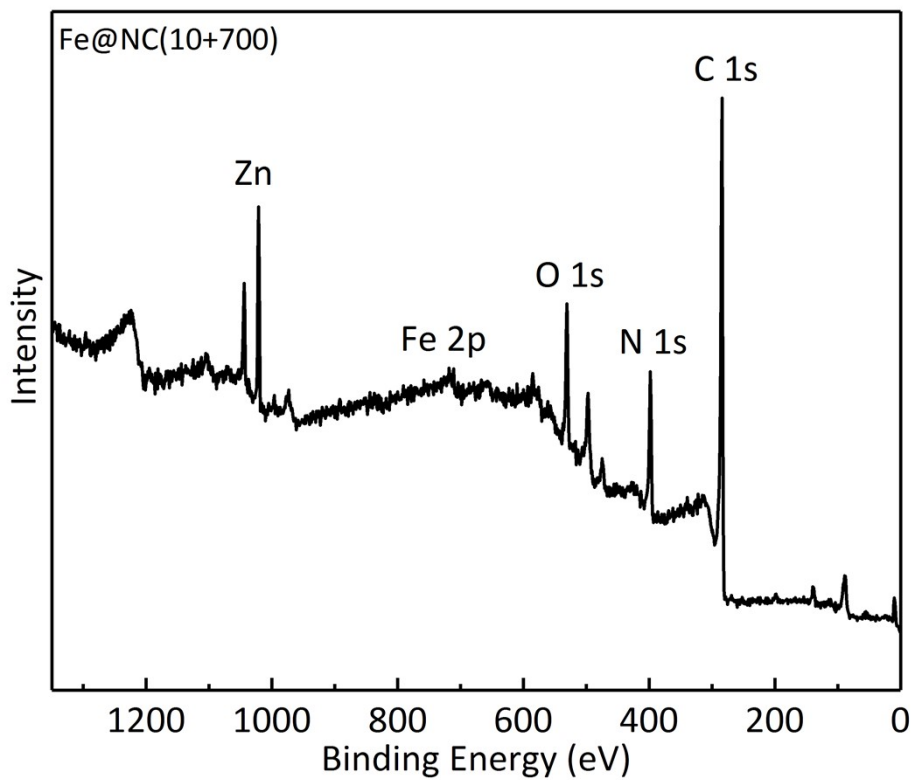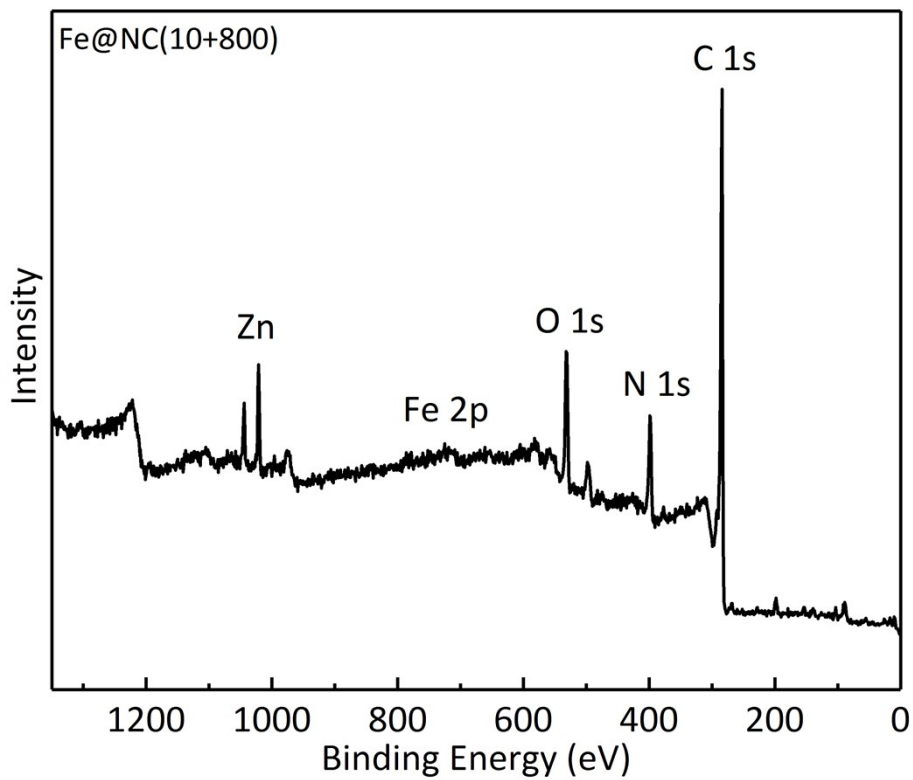

**Figure S19.** Full XPS survey spectra of Fe@NC(10+700) and Fe@NC(10+800).

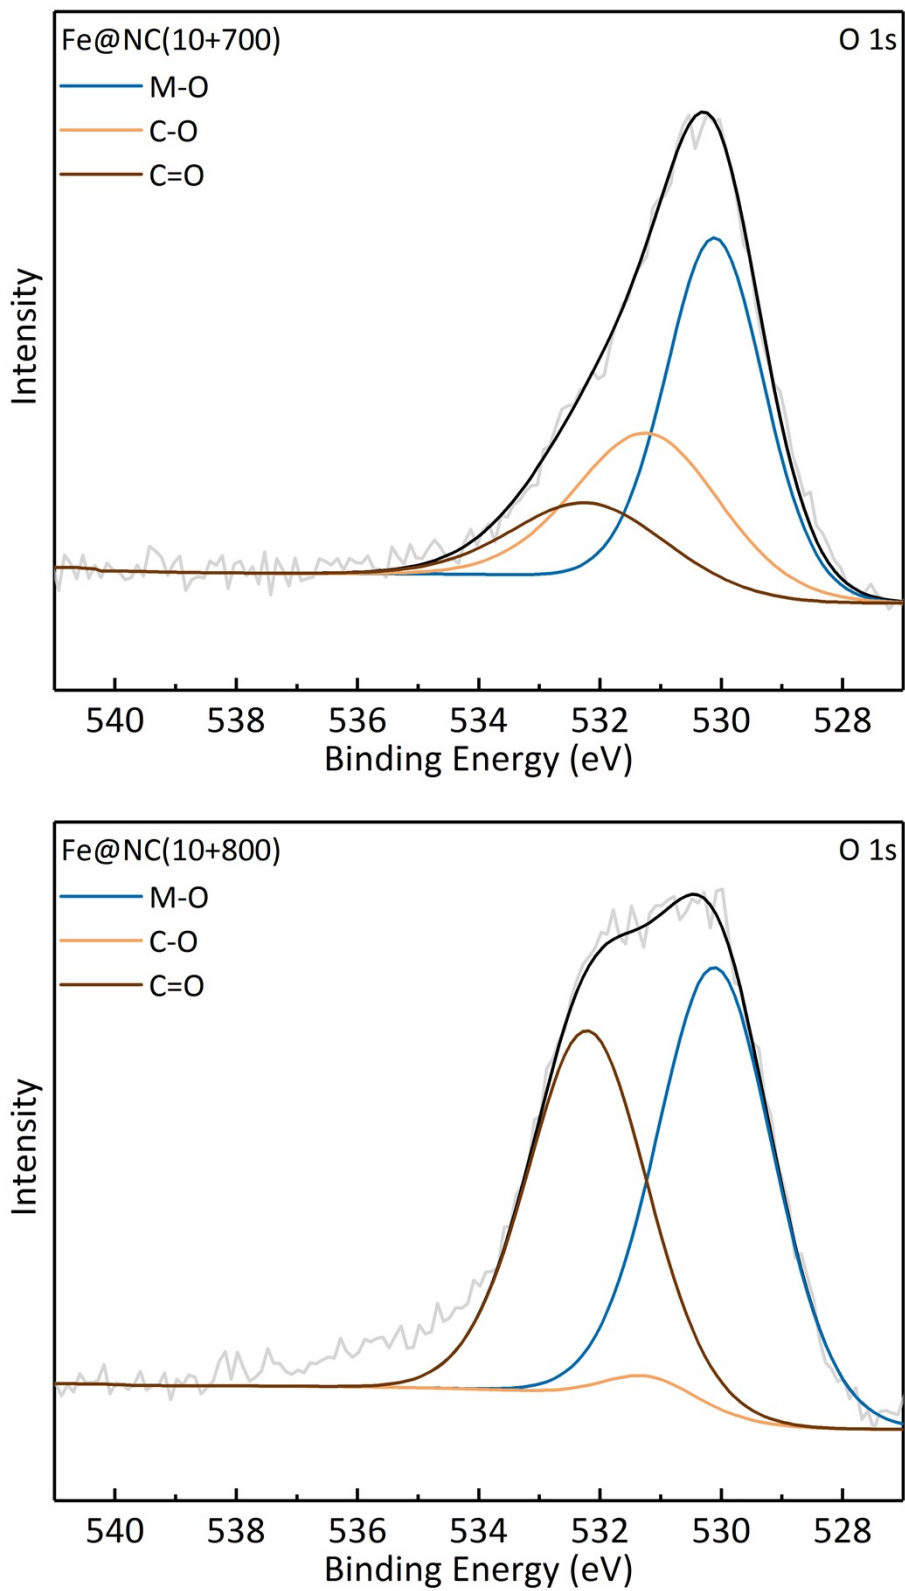

**Figure S20.** The deconvoluted O 1s survey spectra of **Fe@NC(10+700)** and **Fe@NC(10+800)**.

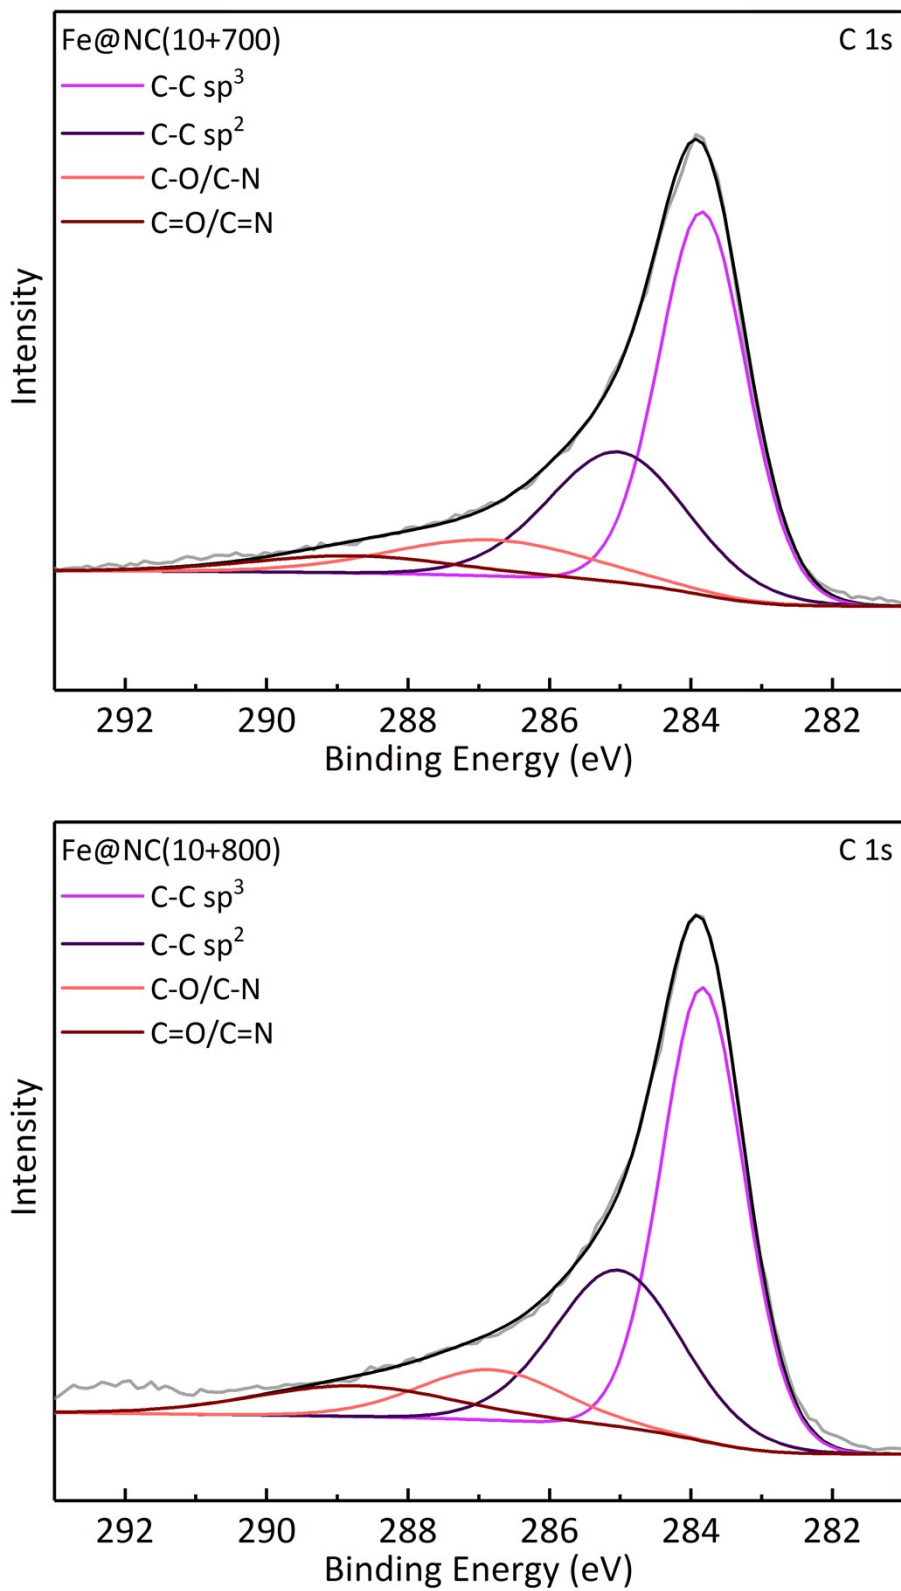

**Figure S21.** The deconvoluted C 1s survey spectra of **Fe@NC(10+700)** and **Fe@NC(10+800)**

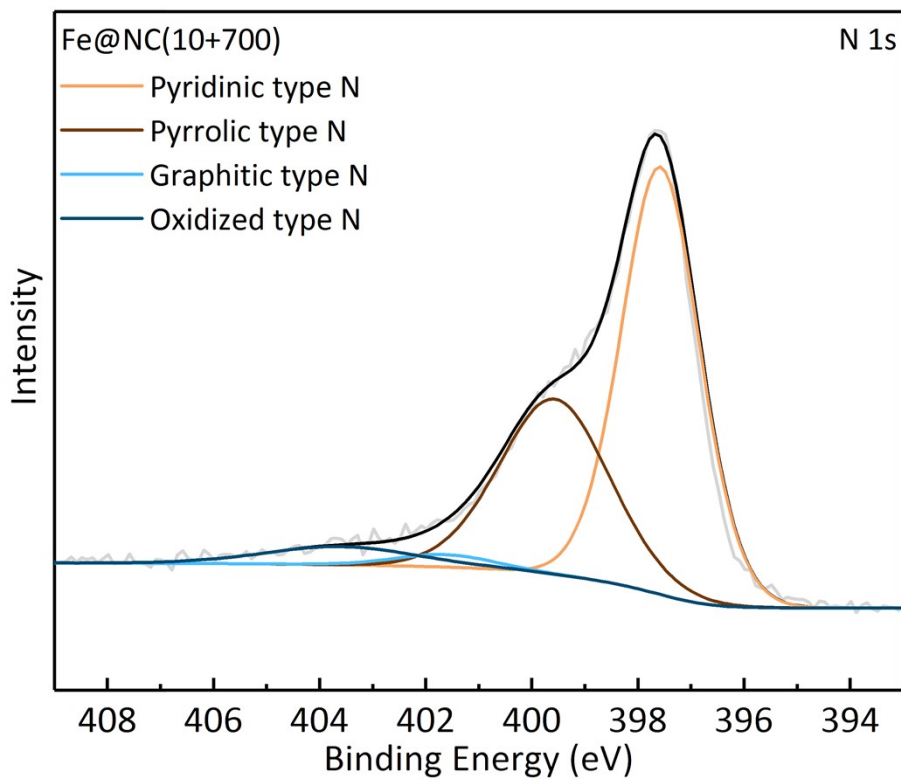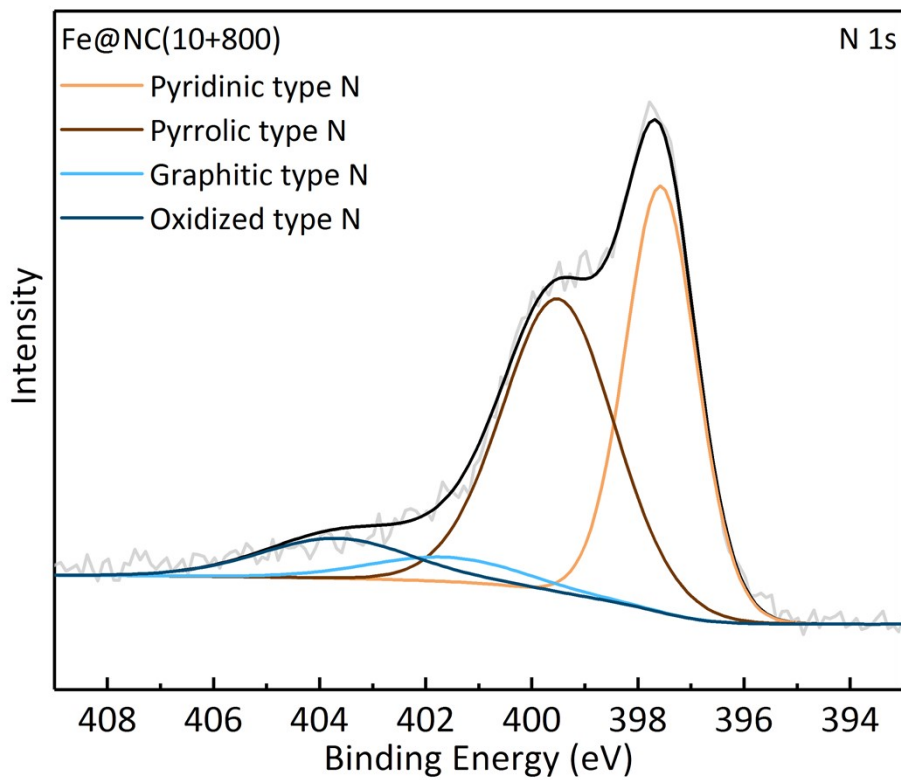

**Figure S22.** The deconvoluted N 1s survey spectra of **Fe@NC(10+700)** and **Fe@NC(10+800)**.

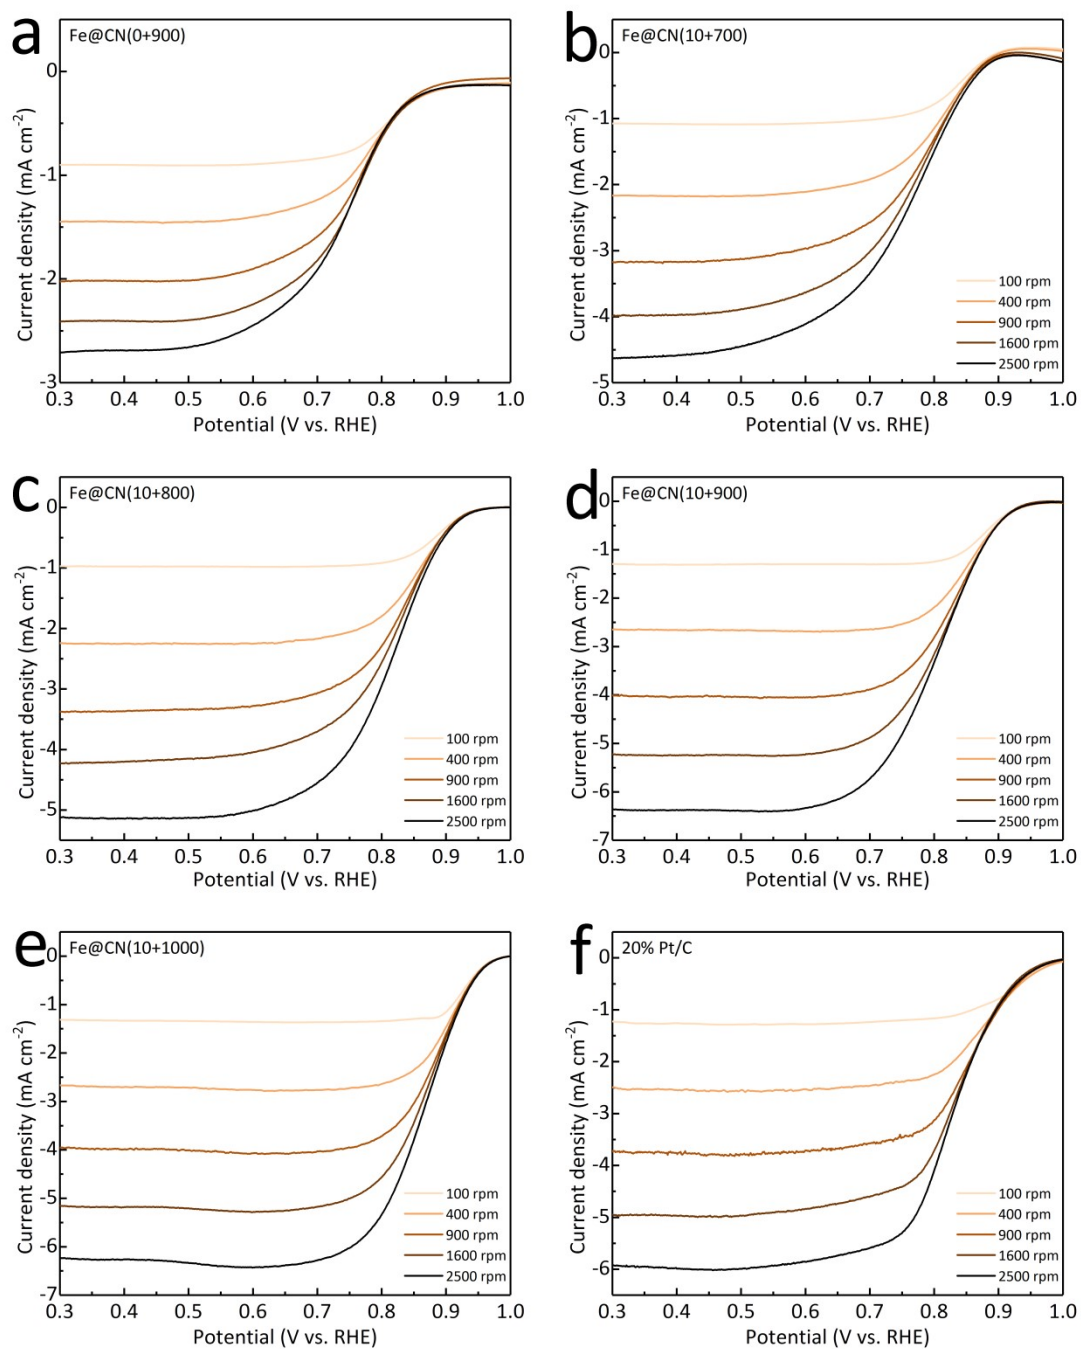

**Figure S23.** RRDE plots with various rotation speeds at a scan rate of  $5 \text{ mV s}^{-1}$  in  $\text{O}_2$ -saturated  $0.1 \text{ M KOH}$  solution of (a)  $\text{Fe@NC}(0+900)$ , (b)  $\text{Fe@NC}(10+700)$ , (c)  $\text{Fe@NC}(10+800)$ , (d)  $\text{Fe@NC}(10+900)$ , (e)  $\text{Fe@NC}(10+1000)$  and (f)  $20\% \text{ Pt/C}$ .

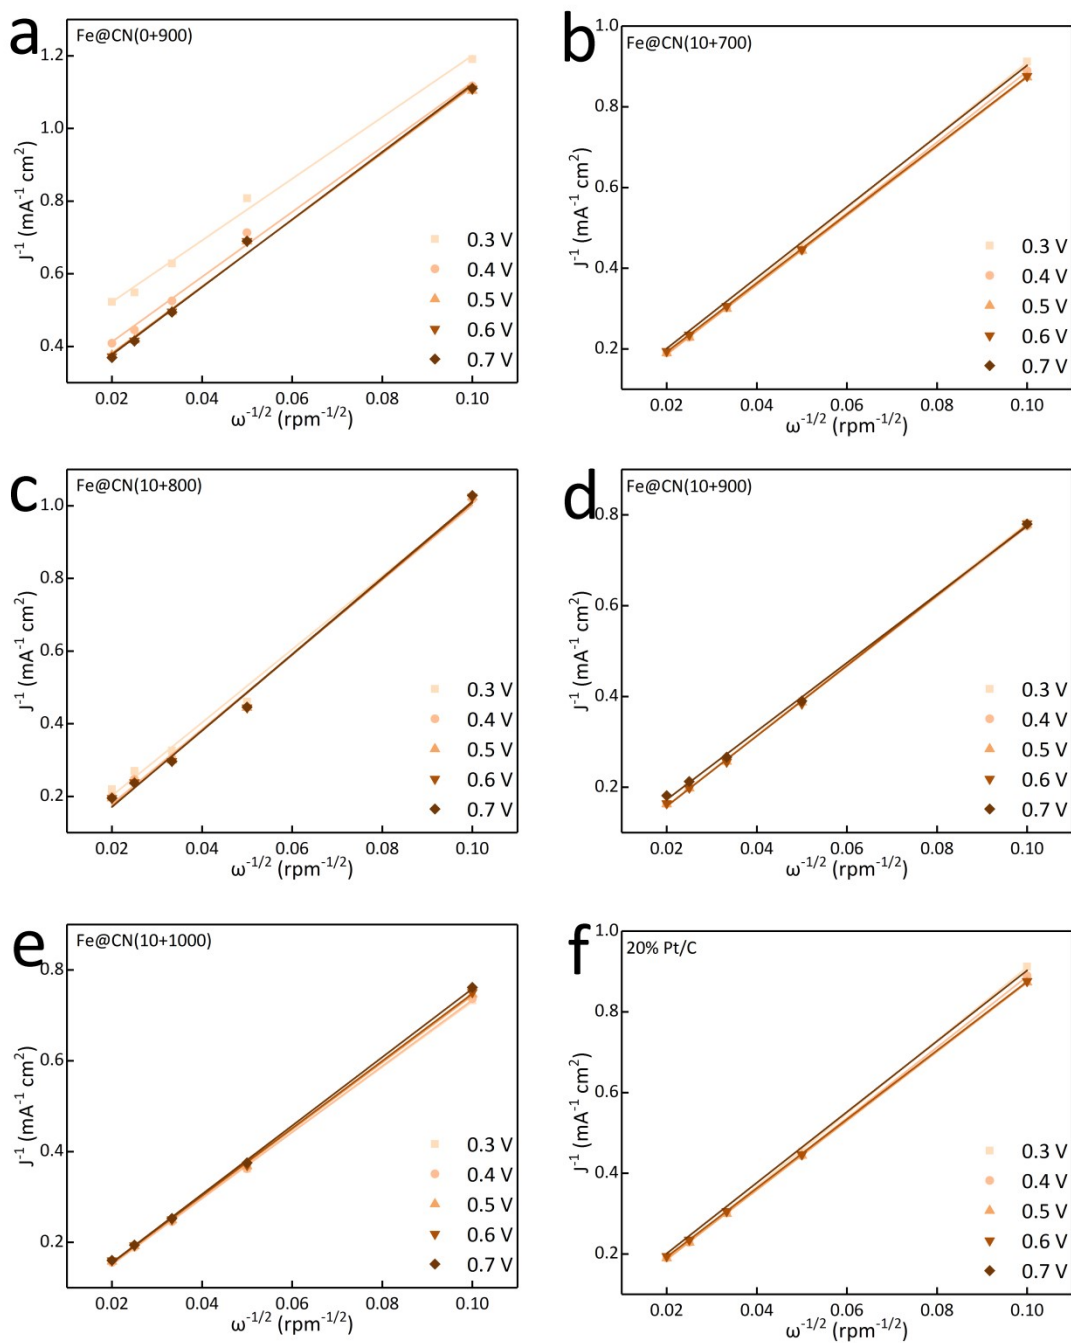

**Figure S24.** K-L plots at various voltages at 1600 rpm in  $O_2$ -saturated 0.1 M KOH solution of (a) Fe@NC(0+900), (b) Fe@NC(10+700), (c) Fe@NC(10+800), (d) Fe@NC(10+900), (e) Fe@NC(10+1000) and (f) 20% Pt/C.

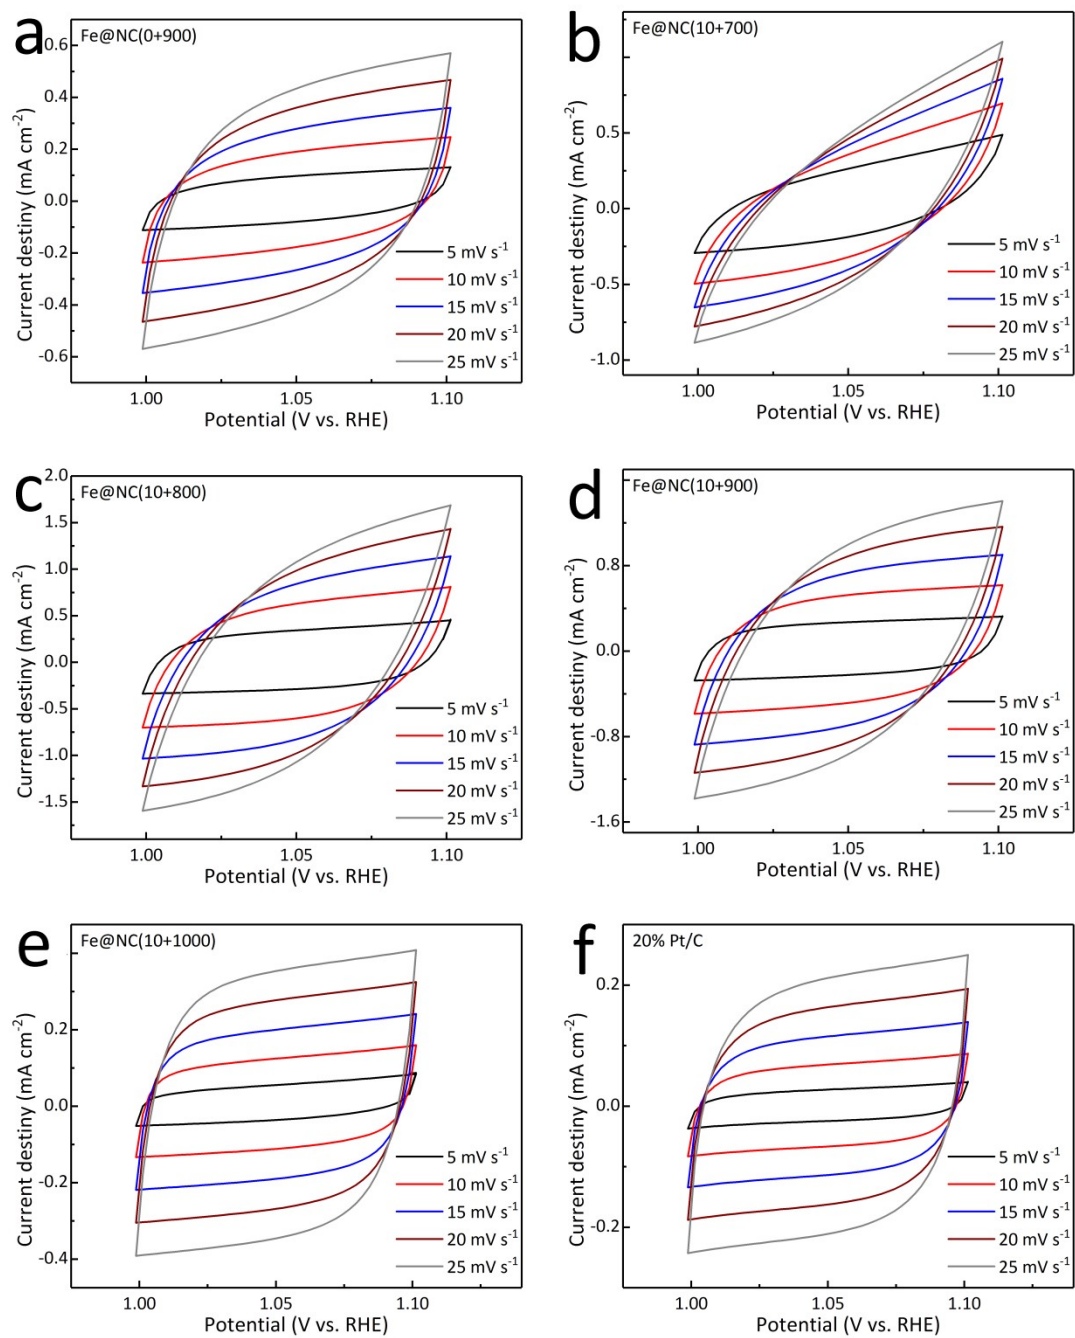

**Figure S25.** The  $C_{dl}$  is calculated from the cyclic voltammograms of (a) Fe@NC(0+900), (b) Fe@NC(10+700), (c) Fe@NC(10+800), (d) Fe@NC(10+900), (e) Fe@NC(10+1000) and (f) 20% Pt/C

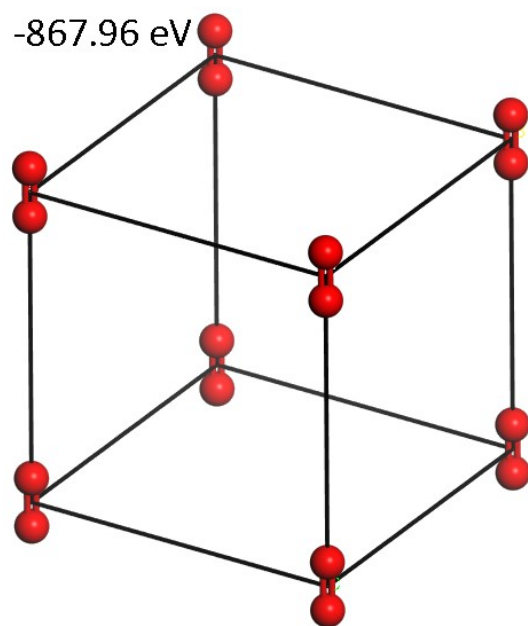

**Figure S26.** Geometrically optimized model for a  $O_2$ .



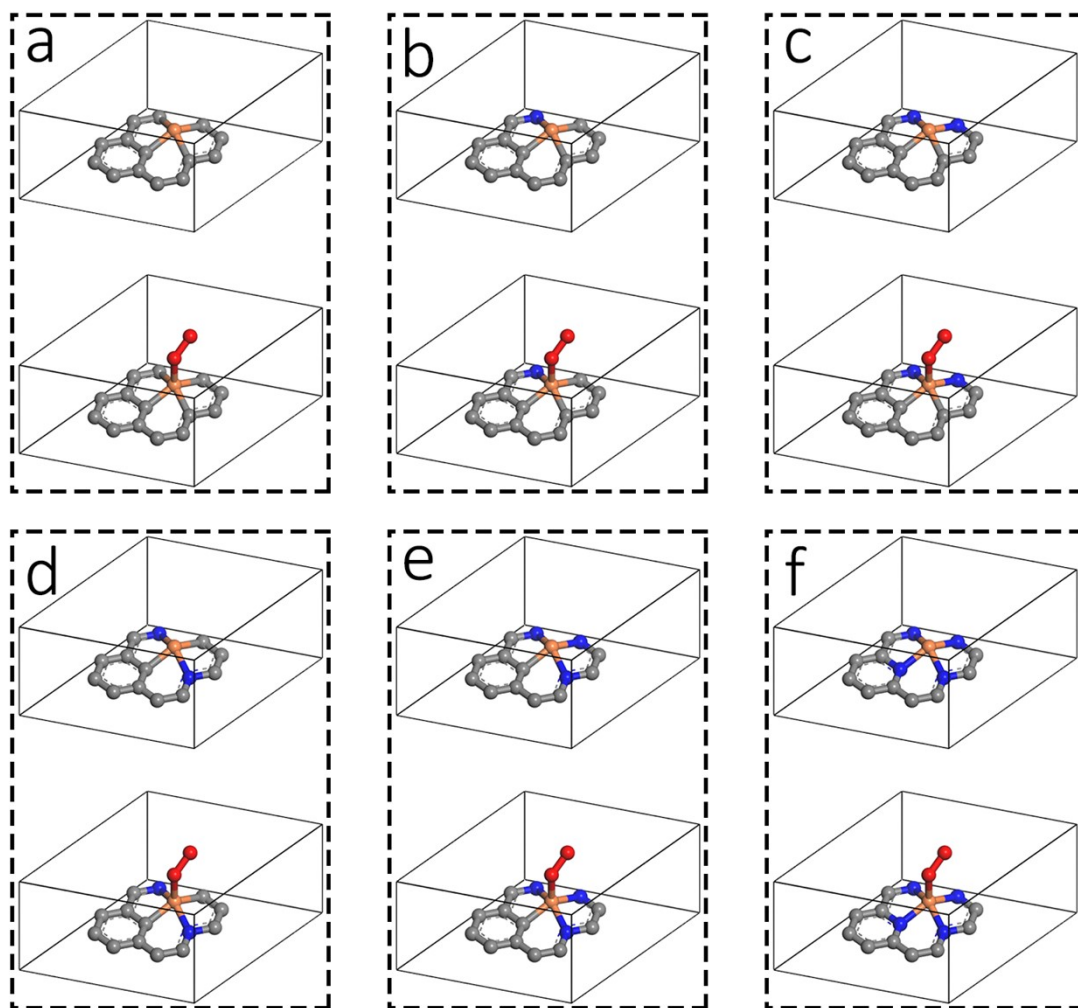

**Figure S27.** Optimized nanostructures of different 4-coordinate Fe active sites.

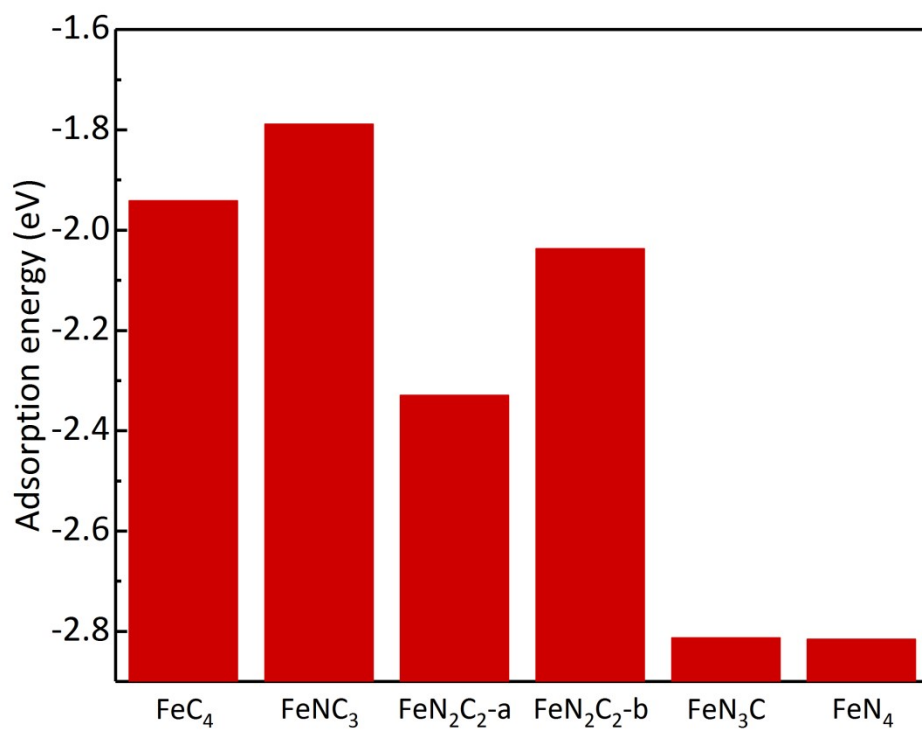

**Figure S28.** O<sub>2</sub> loaded adsorption energy of FeN<sub>x</sub>C<sub>y</sub>.

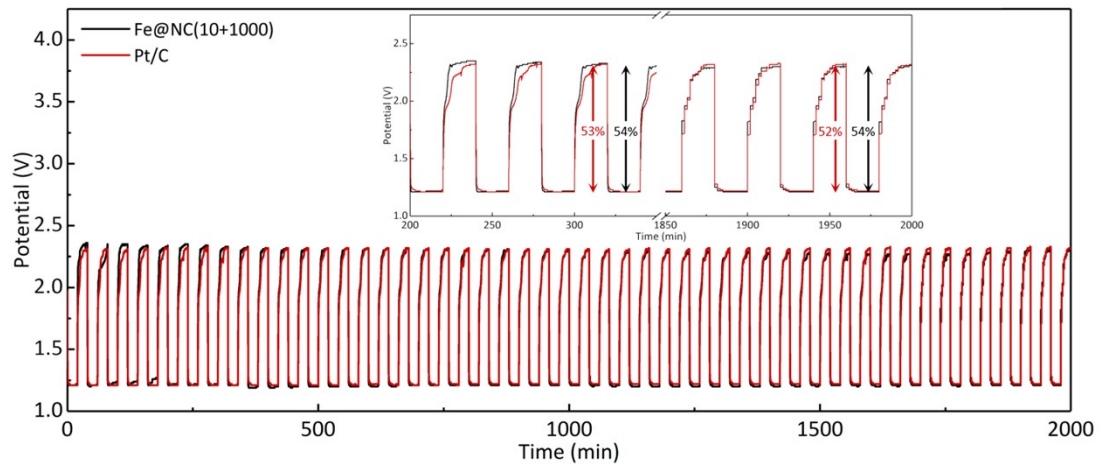

**Figure S29.** The long-term stability at 5 mA cm<sup>-2</sup> of the zinc-air battery based on **Fe@NC(10+1000)** and Pt/C.

**Table S1. Summary of Crystal Data and Refinement Results for BMM-14.**

| <b>Items</b>                      | <b>BMM-14</b>                                                                    |
|-----------------------------------|----------------------------------------------------------------------------------|
| CCDC                              | 2130792                                                                          |
| Formula                           | C <sub>95</sub> H <sub>70</sub> N <sub>51</sub> O <sub>21</sub> Zn <sub>12</sub> |
| Mass                              | 1523.23                                                                          |
| crystal system                    | hexagonal                                                                        |
| space group                       | <i>P63cm</i>                                                                     |
| <i>a</i> (Å)                      | 46.2077                                                                          |
| <i>b</i> (Å)                      | 46.2077                                                                          |
| <i>c</i> (Å)                      | 18.6293                                                                          |
| $\alpha$ (°)                      | 90.00                                                                            |
| $\beta$ (°)                       | 90.00                                                                            |
| $\gamma$ (°)                      | 120.00                                                                           |
| <i>V</i> (Å <sup>3</sup> )        | 34447.3                                                                          |
| <i>T</i> (K)                      | 250                                                                              |
| <i>Z</i>                          | 12                                                                               |
| F(000)                            | 9150.0                                                                           |
| R <sub>int</sub>                  | 0.1619                                                                           |
| R <sub>1</sub> (I>2σ(I))          | 0.1619                                                                           |
| wR <sub>2</sub> (all reflections) | 0.3658                                                                           |

**Table S2. Summary of Gas Sorption Results for BMM-14.**

|                         | BET surface area<br>(m <sup>2</sup> g <sup>-1</sup> ) | NLDFT micropore<br>volume (ml g <sup>-1</sup> ) | NLDFT totalpore<br>volume (ml g <sup>-1</sup> ) |
|-------------------------|-------------------------------------------------------|-------------------------------------------------|-------------------------------------------------|
| <b>Expe_BMM-14</b>      | 1117.4987                                             | 0.5620                                          | 0.6991                                          |
| <b>FePc@BMM-14(0.1)</b> | 763.9485                                              | 0.3794                                          | 0.4647                                          |
| <b>FePc@BMM-14(1)</b>   | 679.5249                                              | 0.3347                                          | 0.4536                                          |
| <b>FePc@BMM-14(10)</b>  | 563.0729                                              | 0.2817                                          | 0.3881                                          |

**Table S3. O 1s Survey Spectra of Fe@NC(x+y).**

|                       | <b>M-O</b> | <b>C-O</b> | <b>C=O</b> |
|-----------------------|------------|------------|------------|
| <b>Fe@NC(0+900)</b>   | 530.1      | 531.2      | 532.2      |
| <b>Fe@NC(10+700)</b>  | 530.1      | 531.2      | 532.2      |
| <b>Fe@NC(10+800)</b>  | 530.1      | 531.4      | 532.2      |
| <b>Fe@NC(10+900)</b>  | 530.1      | 531.3      | 532.2      |
| <b>Fe@NC(10+1000)</b> | 530.1      | 531.2      | 532.2      |

**Table S4. C 1s Survey Spectra of Fe@NC(x+y).**

|                       | C-C sp <sup>3</sup> | C=C sp <sup>2</sup> | C-N   | C=N   |
|-----------------------|---------------------|---------------------|-------|-------|
| <b>Fe@NC(0+900)</b>   | 283.8               | 285.0               | 286.9 | 288.8 |
| <b>Fe@NC(10+700)</b>  | 283.8               | 285.0               | 286.9 | 288.8 |
| <b>Fe@NC(10+800)</b>  | 283.8               | 285.0               | 286.9 | 288.8 |
| <b>Fe@NC(10+900)</b>  | 283.8               | 285.0               | 286.9 | 288.8 |
| <b>Fe@NC(10+1000)</b> | 283.8               | 285.0               | 286.9 | 288.8 |

**Table S5. N 1s Survey Spectra of Fe@NC(x+y).**

|                       | Pyridinic-N | Pyrrolic-N | Graphitic-N | Oxidized-N |
|-----------------------|-------------|------------|-------------|------------|
| <b>Fe@NC(0+900)</b>   | 397.6       | 399.7      | 401.7       | 403.6      |
| <b>Fe@NC(10+700)</b>  | 397.6       | 399.6      | 401.8       | 403.7      |
| <b>Fe@NC(10+800)</b>  | 397.6       | 399.6      | 401.8       | 403.8      |
| <b>Fe@NC(10+900)</b>  | 397.6       | 399.6      | 401.7       | 403.8      |
| <b>Fe@NC(10+1000)</b> | 397.6       | 399.7      | 401.7       | 403.6      |



**Table S6. Zn 2p Survey Spectra of Fe@NC(x+y).**

|                       | <b>Zn(II) 2p<sub>3/2</sub></b> | <b>Zn(II) 2p<sub>1/2</sub></b> |
|-----------------------|--------------------------------|--------------------------------|
| <b>Fe@NC(0+900)</b>   | 1020.78                        | 1043.83                        |
| <b>Fe@NC(10+700)</b>  | 1020.68                        | 1043.68                        |
| <b>Fe@NC(10+800)</b>  | 1020.48                        | 1043.58                        |
| <b>Fe@NC(10+900)</b>  | 1020.93                        | 1044.23                        |
| <b>Fe@NC(10+1000)</b> | 1020.98                        | 1044.18                        |

**Table S7. Fe 2p Survey Spectra of Fe@NC(x+y).**

|                       | <b>Fe(0)</b>            | <b>Fe(II)</b>           | <b>Fe(III)</b>          | <b>Fe(0)</b>            | <b>Fe(II)</b>           | <b>Fe(III)</b>          |
|-----------------------|-------------------------|-------------------------|-------------------------|-------------------------|-------------------------|-------------------------|
|                       | <b>2p<sub>3/2</sub></b> | <b>2p<sub>3/2</sub></b> | <b>2p<sub>3/2</sub></b> | <b>2p<sub>1/2</sub></b> | <b>2p<sub>1/2</sub></b> | <b>2p<sub>1/2</sub></b> |
| <b>Fe@NC(10+700)</b>  | 706.88                  | 709.48                  | 712.28                  | 720.58                  | 722.18                  | 724.58                  |
| <b>Fe@NC(10+800)</b>  | 706.98                  | 709.58                  | 712.38                  | 720.68                  | 722.28                  | 724.68                  |
| <b>Fe@NC(10+900)</b>  | 706.78                  | 709.28                  | 711.83                  | 720.08                  | 721.83                  | 724.03                  |
| <b>Fe@NC(10+1000)</b> | 705.98                  | 708.58                  | 711.08                  | 719.38                  | 721.18                  | 723.28                  |

**Table S8. Comparison of ORR Performance for Fe@NC(10+900/1000) with Reported Carbon-Based Electrocatalysts.**

| <b>Catalyst</b>       | <b>E<sub>onset</sub> (V vs. RHE)</b> | <b>E<sub>1/2</sub> (V vs. RHE)</b> | <b>J<sub>1600</sub> (mA cm<sup>-1</sup>)</b> | <b>Reference</b> |
|-----------------------|--------------------------------------|------------------------------------|----------------------------------------------|------------------|
| <b>C-CZ-4-1000</b>    | 1.03                                 | 0.89                               | -5.9                                         | 1                |
| <b>Co-C@NWCs</b>      | 0.94                                 | 0.83                               | -4.51                                        | 2                |
| <b>CoHNCS-0.2</b>     | 0.94                                 | 0.82                               | -5.8                                         | 3                |
| <b>Co,N-CNF</b>       | 0.88                                 | 0.81                               | -5.7                                         | 4                |
| <b>Fe-N-DSC</b>       | 1.03                                 | 0.83                               | /                                            | 5                |
| <b>Fe-N-RFC_C240</b>  | 1.00                                 | 0.91                               | -5.5                                         | 6                |
| <b>Fe-N-C HNSs</b>    | 1.05                                 | 0.84                               | -5.8                                         | 7                |
| <b>Fe@NC(10+900)</b>  | 0.94                                 | 0.82                               | -5.2                                         | This work        |
| <b>Fe@NC(10+1000)</b> | 0.97                                 | 0.88                               | -5.2                                         | This work        |

1. L. Ge, Y. Yang, L. Wang, W. Zhou, R. D. Marco, Z. G. Chen, J. Zou, Z. H. Zhu, High activity electrocatalysts from metal-organic framework-carbon nanotube templates for the oxygen reduction reaction, *Carbon* **2015**, 82, 417-424.
2. Y. Y. Li, F. Y. Cheng, J. N. Zhang, Z. M. Chen, Q. Xu, S. J. Guo, Cobalt-Carbon Core-Shell Nanoparticles Aligned on Wrinkle of N-Doped Carbon Nanosheets with Pt-Like Activity for Oxygen Reduction, *Small* **2016**, 12, 2839-2845.
3. X. D. Chen, K. Shen, J. Y. Chen, B. B. Huang, D. N. Ding, L. Zhang, Y. W. Li, Rational design of hollow N/Co-doped carbon spheres from bimetal-ZIFs for high-efficiency electrocatalysis, *Chemical Engineering Journal* **2017**, 330, 736-745.
4. L. Shang, H. J. Yu, X. Huang, T. Bian, R. Shi, Y. F. Zhao, G. I. N. Waterhouse, L. Z. Wu, C. H. Tung, T. R. Zhang, *Advance Materials* **2016**, 28, 1668-1674.
5. Z. Huang, H. Y. Pan, W. J. Yang, H. H. Zhou, N. Gao, C. P. Fu, S. C. Li, H. X. Li, Y. F. Kuang, *ACS Nano* **2018**, 12, 208-216.
6. M. Kim, H. S. Kim, S. J. Yoo, W. C. Yoo, Y.-E. Sung, The role of pre-defined microporosity in catalytic site formation for the oxygen reduction reaction in iron- and nitrogen-doped carbon materials, *Journal of Materials Chemistry A* **2017**, 5, 4199-4206.
7. Y. F. Chen, Z. J. Li, Y. B. Zhu, D. M. Sun, X. E. Liu, L. Xu, Y. W. Tang, Atomic Fe Dispersed on N-Doped Carbon Hollow Nanospheres for High-Efficiency Electrocatalytic Oxygen Reduction, *Advance Materials* **2019**, 31, 1806312.
